# Supplementary material for: Colorimetric assay based on arginine-functionalized gold nanoparticles for the detection of dibutyl phthalate in Baijiu samples
Source: Royal Society of Chemistry journal article supplement (doi:10.1039/d1ay01464a), 2021-01-01
Supplement: d1ay01464a1.pdf [file d1ay01464a1.pdf]

## **Supporting Information**

### **Colorimetric assay based on arginine-functionalized gold nanoparticles for detection of dibutyl phthalate in Baijiu samples**

Yumei Yan<sup>1</sup>, Yuan Qu<sup>1</sup>, Rui Du<sup>1</sup>, Wenfeng Zhou<sup>1</sup>, Haixiang Gao<sup>1</sup>, Runhua Lu<sup>1\*</sup>,

<sup>1</sup> Department of Applied Chemistry, China Agricultural University, Yuanmingyuan West Road 2#, Haidian District, Beijing 100193, China

#### **Corresponding author**

\*E-mail addresses: Runhua Lu [rhlu@cau.edu.cn](mailto:rhlu@cau.edu.cn)

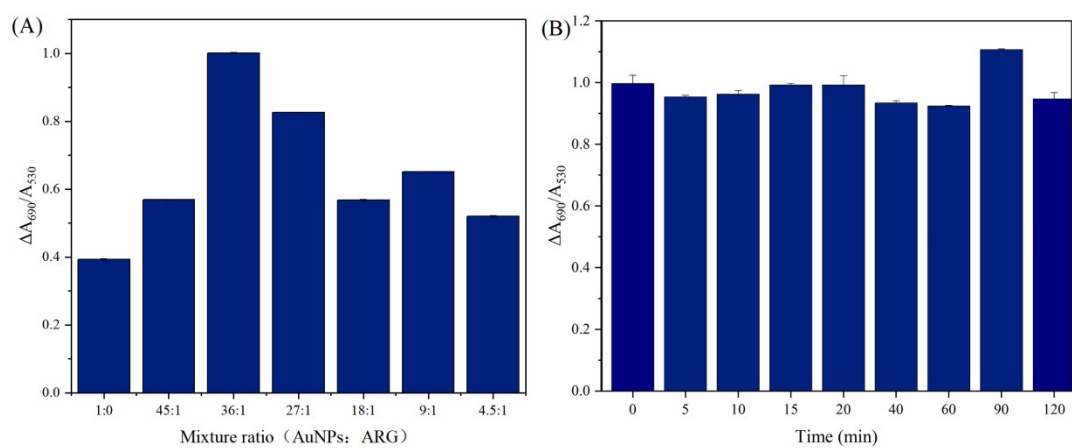

**Fig. S1** Absorbance ratio of different AuNPs to ARG ratio (A) different reaction time (B) in the presence of  $1.0 \text{ mg} \cdot \text{L}^{-1}$  DBP(n=3).

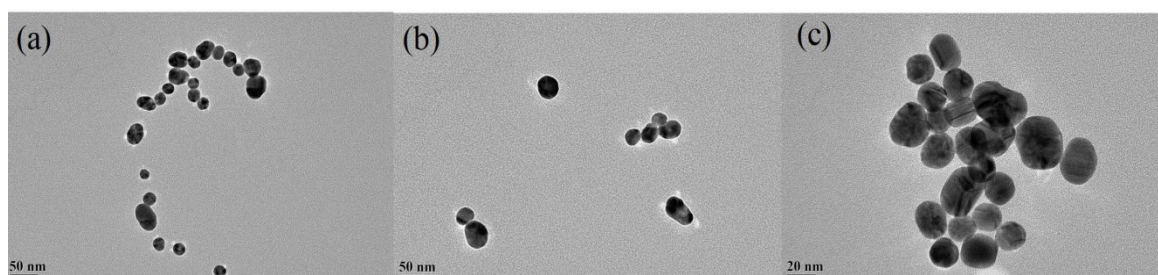

**Fig. S2** TEM images of (a) AuNPs, (b) ARG-AuNPs and (c) the aggregation of ARG-AuNPs induced by DBP.

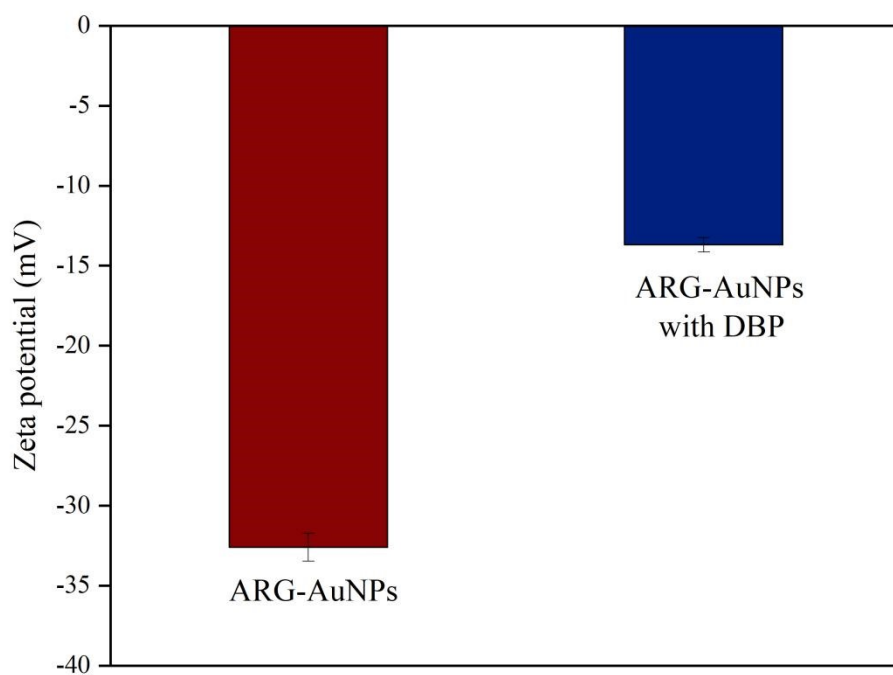

**Fig. S3** Zeta potential value of the ARG-AuNPs (red bar) and ARG-AuNPs in the presence of  $1.0 \text{ mg} \cdot \text{L}^{-1}$  DBP (blue bar)(n=3).

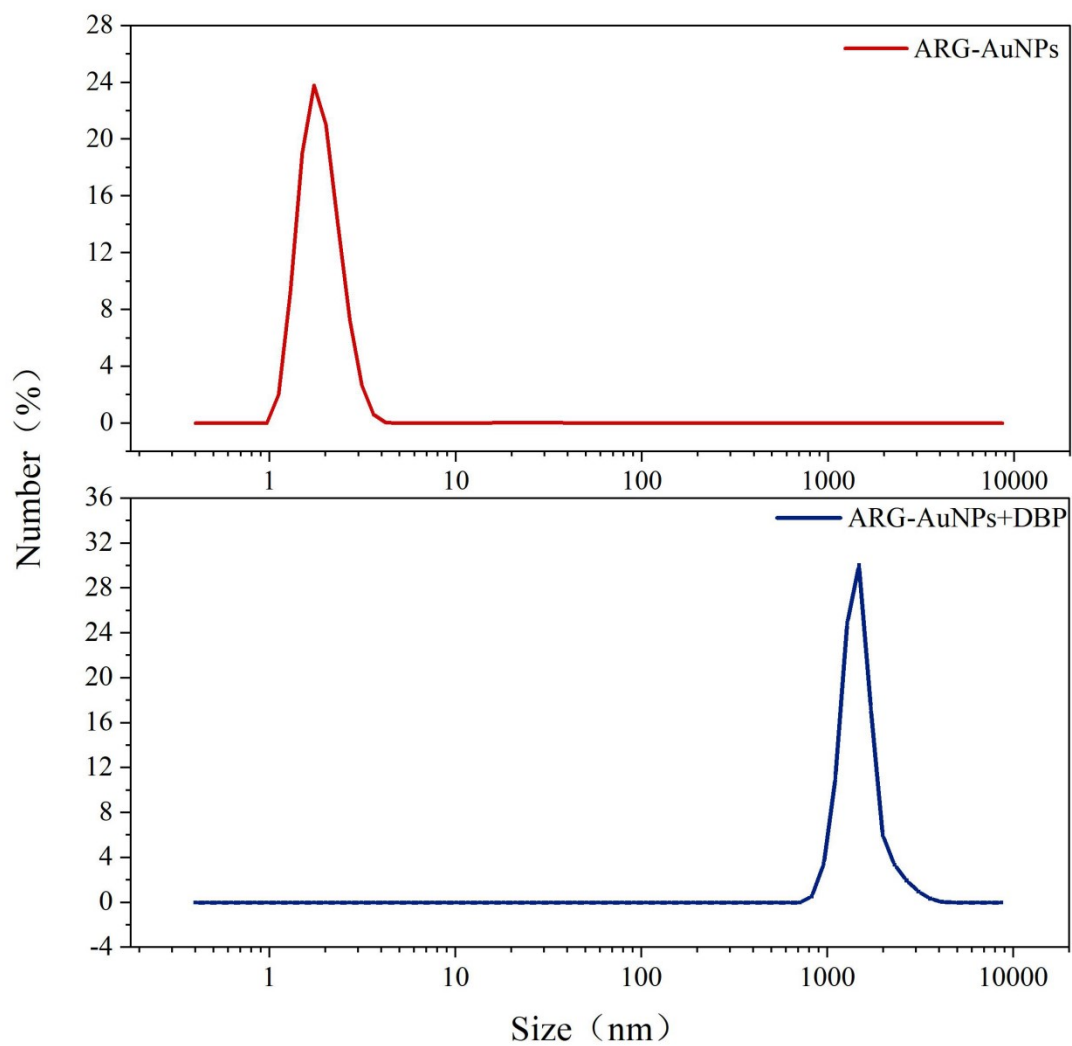

**Fig. S4** size distribution graph of ARG-AuNPs (red line) and ARG-AuNPs in the presence of  $1.0 \text{ mg} \cdot \text{L}^{-1}$  DBP (blue line).

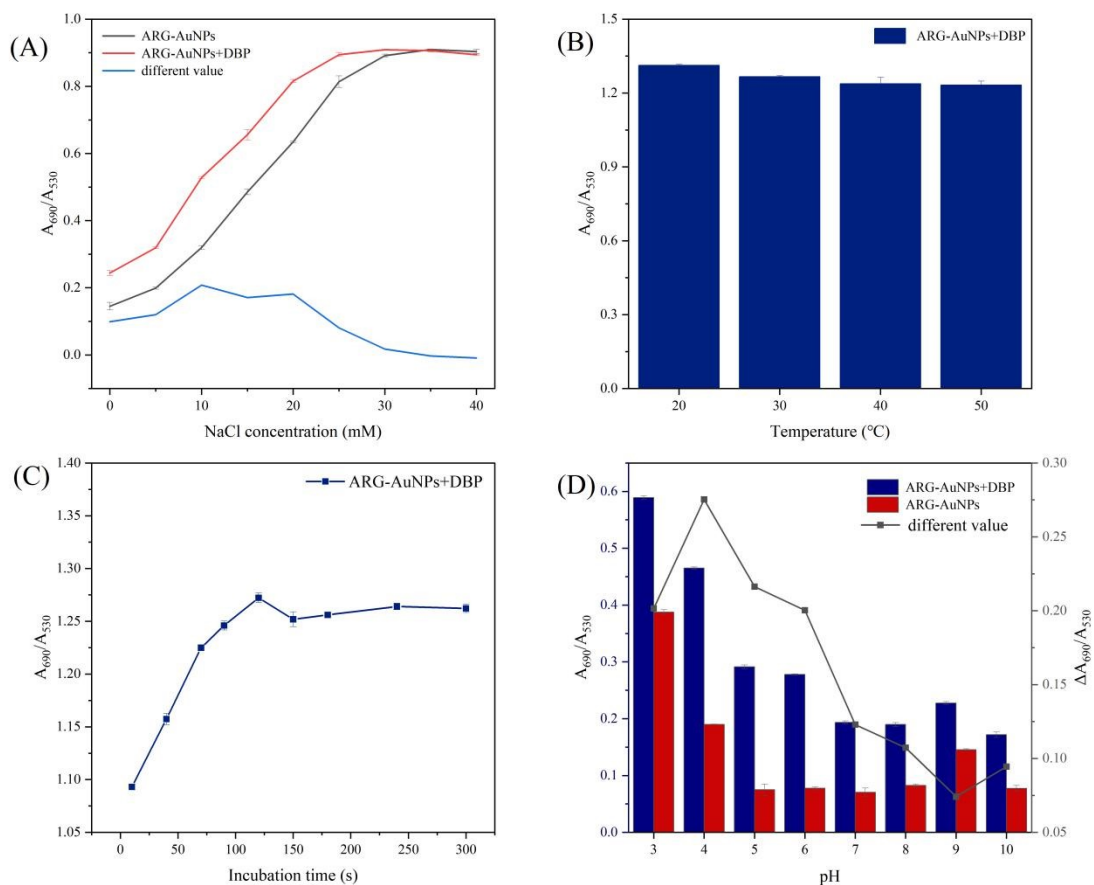

**Fig. S5.** (A) Effect of NaCl concentrations on the absorption ratio ( $A_{690}/A_{530}$ ) of ARG-AuNPs in the absence (black line), presence (red line) of  $1.0 \text{ mg} \cdot \text{L}^{-1}$  DBP and different value of absorbance ratio between the two cases (blue line),(n=3) (B) The influence of temperature on ARG-AuNPs and(n=3) (C) Effect of incubation time in the presence of  $1.0 \text{ mg} \cdot \text{L}^{-1}$  DBP,(n=3) (D) Dependence of the pH on the absorption ratio ( $A_{690}/A_{530}$ ) of ARG-AuNPs in the absence (red bar), presence (blue bar) of  $1.0 \text{ mg} \cdot \text{L}^{-1}$  DBP and different value of absorbance ratio between the two cases (black line)(n=3).

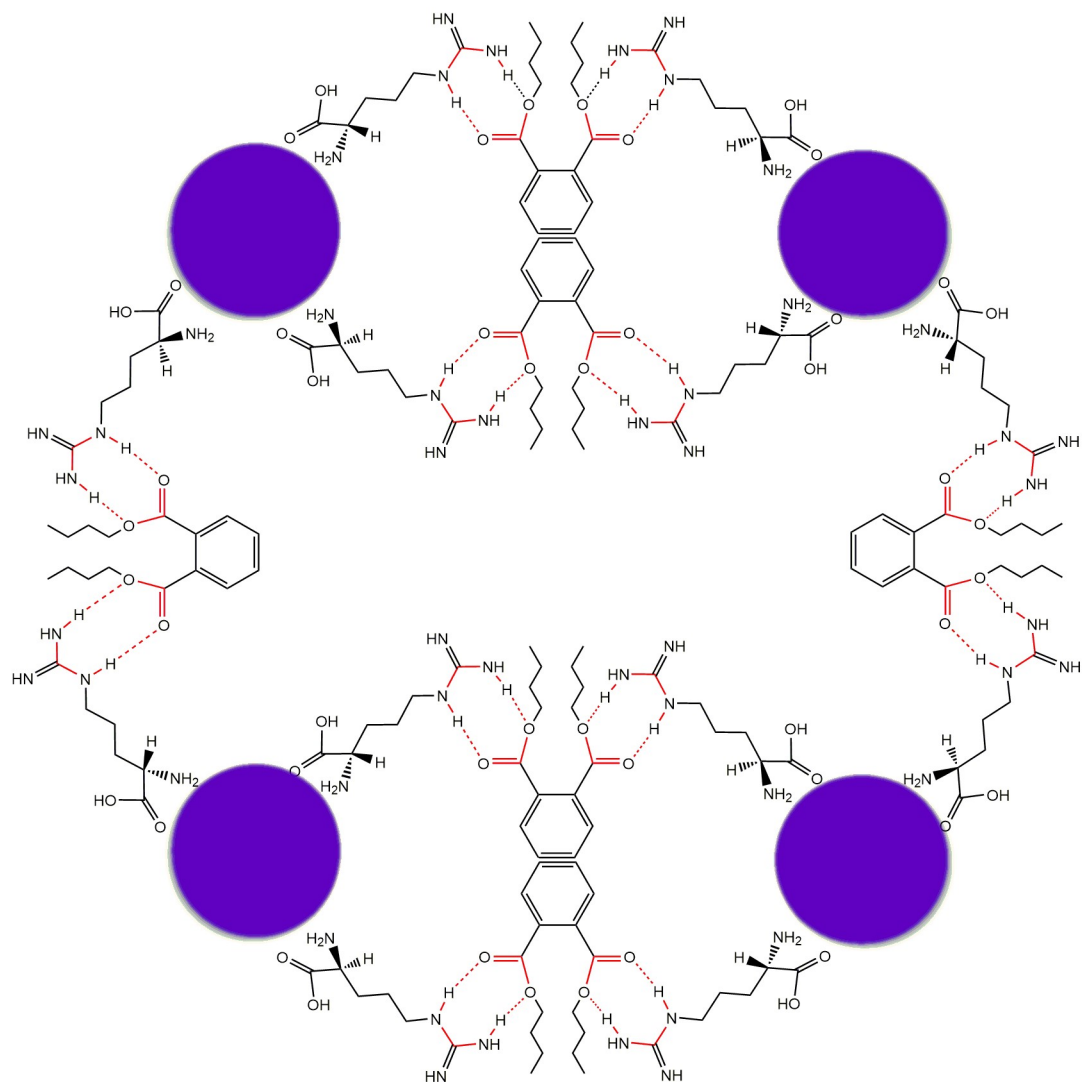

**Fig.S6** Schematic diagram of the hydrogen bond interaction between the functionalized molecule arginine on the surface of AuNPs and DBP.
